# Supplementary material
Source: PubMed Central journal article supplement (PMC5931375)
Supplement: NIHMS871853-supplement-1.pdf [file NIHMS871853-supplement-1.pdf]

**Figure A**

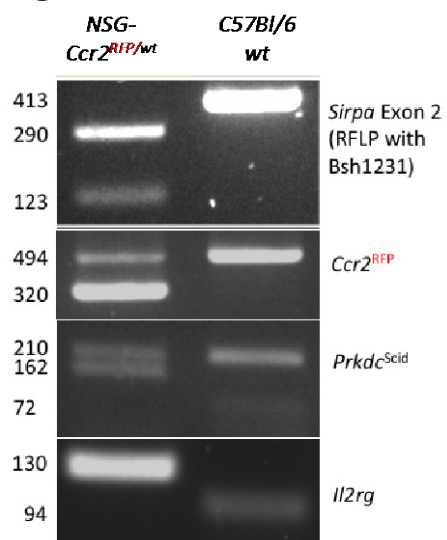

**Supplementary Table 1**

| <b>Antibody</b>            | <b>Use</b>         | <b>Clone</b> | <b>Company</b>           |
|----------------------------|--------------------|--------------|--------------------------|
| Mouse CD45                 | FACS               | 30-F11       | Biolegend                |
| Mouse CD8a                 | FACS               | 53-6.7       | Biolegend                |
| Mouse CD19                 | FACS               | 6D5          | Biolegend                |
| Mouse Ter119               | FACS               | TER-119      | Biolegend                |
| Mouse Gr1                  | FACS               | RB6-8C5      | Biolegend                |
| Mouse TCR $\beta$          | FACS               | H57-97       | BD                       |
| Mouse CD4                  | FACS               | GK1.5        | Biolegend                |
| Mouse/human CD11b          | FACS               | M1/70        | Biolegend                |
| Mouse F4/80                | FACS               | BM8          | Biolegend                |
| Mouse PD-1                 | FACS,<br>treatment | 29F.1A12     | Biolegend                |
| Mouse PD-1                 | IF                 | J43          | eBioscience              |
| Mouse CD4                  | IF                 | GK1.5        | Abcam                    |
| Mouse CD68                 | IF                 | KPI          | Abcam                    |
| Mouse PD-1 isotype control | FACS               | RTK2758      | Biolegend                |
| Human CD45                 | FACS               | HI30         | Biolegend                |
| Human TCR $\alpha/\beta$   | FACS               | IP26         | Biolegend                |
| Human CD4                  | FACS               | OKT4         | Biolegend                |
| Human CD64                 | FACS               | 10.1         | Biolegend                |
| Human CD206                | FACS               | 15-2         | Biolegend                |
| Human PD-1                 | FACS               | EH12.2H7     | Biolegend                |
| Human PD-1 isotype control | FACS               | MOPC-21      | Biolegend                |
| Human CD32 (block)         | FACS               | IV.3         | Stemcell<br>Technologies |
| Human CD47                 | Treatment          | B6.H12       | BioXcell                 |

**Supplementary Table 2**

| Colorectal cancer stage | Number conversion |
|-------------------------|-------------------|
| 0                       | 0                 |
| 1                       | 1                 |
| 2A                      | 2                 |
| 2B                      | 2.33              |
| 2C                      | 2.66              |
| 3A                      | 3                 |
| 3B                      | 3.33              |
| 3C                      | 3.66              |
| 4A                      | 4                 |
| 4B                      | 4.5               |

**Supplementary Table 3**

| <b>Sirpa exon 2</b> |                                              |                                        |                   |
|---------------------|----------------------------------------------|----------------------------------------|-------------------|
| SirpExon 2fw        | TGG CTG CCA TCT TTC TT                       | Sirpa exon 2                           | 402 bp            |
| SirpExon 2rev       | TGA AGA AGG CAC AGG CTT ACT                  | Bsh1231 cuts only homozygous NOD Sirpa |                   |
|                     |                                              | Two fragments                          | 112 and 290 bp    |
| <b>Prkdscid</b>     |                                              |                                        |                   |
| Scid F              | GAGAAAAGGAGGATCATGGATTCAAGAA<br>ATAAATGTAACG | Common (F/R)                           | 210 bp (common)   |
| WR                  | TGGCCCCTGCTAACTTTCTCTTAGCA                   | Scid specific (MF/R)                   | 162 bp            |
| MF                  | TGGTATCCACAACATAAAATACGCTAA                  | Prkdc specific (F/WR)                  | 72 bp             |
| Scid R              | CCTAAGAGTCACTTTCTCCATTTACACAGTGAAGTGCC       |                                        |                   |
| <b>Ccr2-RFP</b>     |                                              |                                        |                   |
| 13505               | TAA ACC TGG TCA CCA CAT GC                   | Wild type                              | 494 bp            |
| 13506               | GGA GTA GAG TGG AGG CAG GA                   | Mutant                                 | 320 bp            |
| 13507               | CTT GAT GAC GTC CTC GGA G                    | Heterozygote                           | 320 bp and 494 bp |
| <b>Il2rg</b>        |                                              |                                        |                   |
| 19475               | AAG AGA TTA CTT CTG GCT GTC AG               | Wild type                              | 94 bp             |
| 19477               | CTC TGG GGT TTC TGG GG                       | Mutant                                 | 130 bp            |
| oIMR391 4           | ATG CTC CAG ACT GCC TTG                      | Heterozygote                           | 94 bp and 130 bp  |
